# Supplementary material for: Production of red-flowered plants by genetic engineering of multiple flavonoid biosynthetic genes
Source: Springer Nature journal article supplement (doi:10.1007/s00299-007-0401-0), 2007-07-16
Supplement: 299_2007_401_MOESM1_ESM.pdf [file 299_2007_401_MOESM1_ESM.pdf]

1  
2  
3  
4  
5  
6 **Supplemental Figure S1. Expression profiles of flavonoid biosynthetic structural genes**  
7  
8  
9 **in wild-type tobacco flowers**

- 10  
11 15 a) Tobacco flowers used for northern blot analysis. Bar indicates 1 cm.  
12  
13  
14 b) Northern blot analysis was performed using total RNAs from isolated petal samples at four  
15  
16 different flower developmental stages (S1-S4) as defined by Nishihara et al. (2005). Total  
17  
18 RNA, blotted onto nylon membrane, was hybridized by each DIG-labeled gene probe.  
19  
20 Ethidium bromide stained ribosomal RNA band (rRNA) are shown as a control.  
21  
22  
23  
24  
25 20 PAL: phenylalanine ammonia lyase (accession number AB289451), CHS: chalcone synthase  
26  
27 (AF311783), CHI: chalcone isomerase (AB213651), F3H: flavanone 3-hydroxylase  
28  
29 (AB289450), F3'H: flavonoid 3'-hydroxylase (AB289449), DFR: dihydroflavonol  
30  
31 4-reductase (AB289448), ANS: anthocyanidin synthase (AB289447), FLS: flavonol synthase  
32  
33 (AB289452), UBI: ubiquitin (DQ138111).  
34  
35  
36  
37  
38  
39  
40

41 **Supplemental Figure S2. Alignment of deduced amino acid sequences of two tobacco**

42  
43  
44 5 ***DFR* genes**

45  
46 The Genbank accession numbers of *DFR* genes were shown as follows; tobacco 1  
47  
48 and 2 (present study), petunia (accession number X79723), gentian (D85185), maize  
49  
50 (X05068), gerbera (Z17221).  
51

- 52  
53  
54 Asterisks indicate common amino sequences. Triangle and gray box show the  
55  
56  
57 10 important amino acid residues that *DFR* enzyme distinguishes DHK with other  
58  
59 dihydroflavonols as a substrate.  
60

**a**

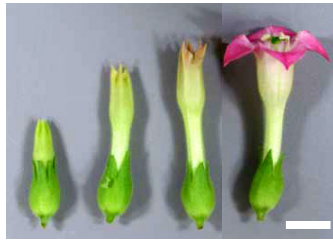

**S1 S2 S3 S4**

**b**

*NtPAL*

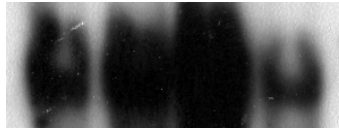

*NtCHS*

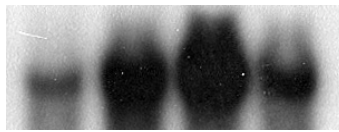

*NtCHI*

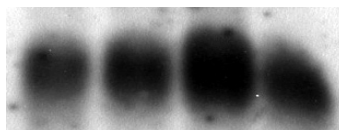

*NtF3H*

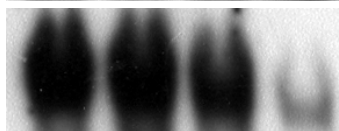

*NtF3'H*

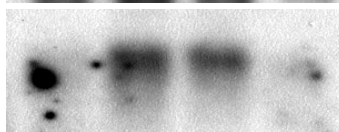

*NtDFR*

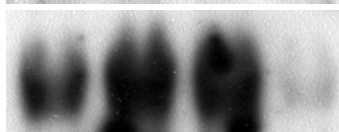

*NtANS*

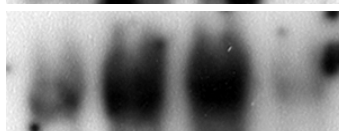

*NtFLS*

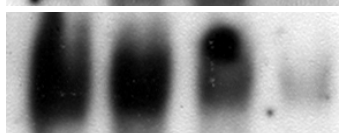

*NtUBQ*

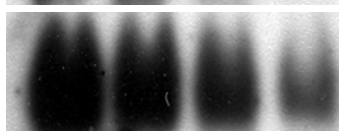

**rRNA**

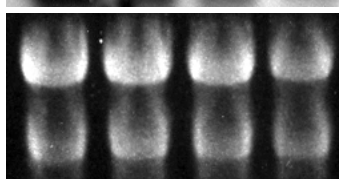

Supplemental Figure S1

|          |     |                                                                                     |     |
|----------|-----|-------------------------------------------------------------------------------------|-----|
| Tobacco1 | 1   | MASEAHAHVHAP-PPVA-PTVCVTGAAGFIGSWLVMRLLERGVNHATVVRDPENKKKVKHLFELPKADTNLTLWKADLSV    | 78  |
| Tobacco2 | 1   | MASEGHAHVHAPSPPAA-PTVCVTGAAGFIGSWLVMRLLERGVNHATVVRDPENKKKVKHLELEPKADTNLTLWKADLSV    | 79  |
| Petunia  | 1   | ---MASEAVHAPSPPVAVPTVCVTGAAGFIGSWLVMRLLERGVNHATVVRDPENKKKVKHLELEPKADTNLTLWKADLTV    | 77  |
| Gentian  | 1   | -----MEGGILSNATTVCVTGASGYIGSWLAMRLLERGYTVRATVVRDPGNLKKVQHLELEPKASTNLTLLKADLTE       | 71  |
| Maize    | 1   | -----MERGAGASEKGTVLVTGASGFGVSWLVMKLLQAGYTVRATVVRDPANVGKTKPLMDLPGATERLSIWKADLAE      | 72  |
| Gerbera  | 1   | -----MEEDSPATVTCVTGAAGFIGSWLVMRLLERGVVHATVVRDPGDLLKVKHLELEPKAQTNLKLWKADLTQ          | 68  |
|          |     | **.****.*.*****.*.....** * ..**.*..*. * ..**.*..*                                   |     |
|          |     | ▽                                                                                   |     |
| Tobacco1 | 79  | EGSFDEAIQGCQGVFHVATPDMDFESEDPENEVIKPTVGRGLSIIESCACANTVKRLVFTSSAGTLDAQEHQKLFYDETS    | 158 |
| Tobacco2 | 80  | EGSFVEAIQGCQGVFHVATPDMDFESEDPENEVIKPTVGRGLSIIESCACANTVKRLVFTSSAGTVDVQEHQKLLYDETS    | 159 |
| Petunia  | 78  | EGSFDEAIQGCQGVFHVATPDMDFESKDPENEVIKPTVGRGLSIIESCACANTVKRLVFTSSAGTLDVQEQKLFYDQTSW    | 157 |
| Gentian  | 72  | EGSFDEAIHGCHGVFHVATPDMDFESKDPKNEVIKPTIDGFLSIIIRSCVKAQTVKVLVFTSSAGTVDVQEQKPVYDENDW   | 151 |
| Maize    | 73  | EGSFHDAIRGCTGVFHVATPDMDFLSKDPENEVIKPTVEGMSIIMRACKEAGTVRRIVFTSSAGTVNLEERQRPVYDEESW   | 152 |
| Gerbera  | 69  | EGSFDEAIQGCQGVFHVATPDMDFESKDPENETIKPTIEGVLISIIIRSCVKAQTVKVLVFTSSAGTVNGQEQQLHVYDESHW | 148 |
|          |     | ****.*..**.*..*****.*..**.*..**.*..**.*..* ..**.*..* ..**.*..* ..**.*..*            |     |
| Tobacco1 | 159 | SDDLFIYAKKMTGWMYFVSKILAEEAAMEAAKKKNDFISIIPLVVGPFITPTFPPLSLITALSITGNEAHYCIKQGG       | 238 |
| Tobacco2 | 160 | SDDLFIYAKKMTGWMYFVSKILAEEAAMEAAKKKNIDFISIIPLVVGPFILPTFPPLSLITALSITGNEAHYSIIKQGG     | 239 |
| Petunia  | 158 | SDDLFIYAKKMTGWMYFASKILAEEAAMEAAKKKNIDFISIIPLVVGPFITPTFPPLSLITALSITGNEAHYCIKQGG      | 237 |
| Gentian  | 152 | SDDLFINSTKMTGWMYFVSKILAEEAAMEAVTKPNIDGFIISIIPLVVGPFITPTFPPLSLITALSITGNEAHYGIKQGG    | 231 |
| Maize    | 153 | TDVDFCRVVKMTGWMYFVSKTLAEEAALAYAAEHGLDVTIIPTLVVGPFISASMPPLSLITALALITGNAPHYSILKQVQ    | 232 |
| Gerbera  | 149 | SDDLFIYSKMTAWMYFVSKTLAEEAADWATKGNISFISIIPLVVGPFITSTFPPLSLITALSITGNEAHYSIIKQGG       | 228 |
|          |     | *..**.*..*..**.*..**.*..**.*..**.*..* ..**.*..* ..**.*..* ..**.*..*                 |     |
| Tobacco1 | 239 | YVHDDLCEAHIFLYEQPKAEGRFICASHHAIIDYVAKMVREKWPPEYVPTFVKGDIDKDLPVVYFSPKCLTDMGFQFKY-    | 317 |
| Tobacco2 | 240 | YVHDDLCEAHIFLYEHPKAEGRFICASHHAIIDYVAKMVQEKWPPEYVPTFVKGDIDKDLVSVYFSSKCLTDMGFQFKY-    | 318 |
| Petunia  | 238 | YVHDDLCEAHIFLYEHPKADGRFICSSHHAIIDYVAKMVREKWPPEYVPTFVKGDIDKDLPVVYFSSKCLTDMGFQFKY-    | 316 |
| Gentian  | 232 | FVHDDLCEAHIFLYEHPKAEGRYICSSHDTTIDHLAKMIRQNWPEYYIPTKLGIDEDIPVVSFSNNKLDLGFQYKY-       | 310 |
| Maize    | 233 | LIHDDLCDAEIFLFFENPAAAGRYVCSHDTIHLAAMLRDRYPEYDVPQRFPGIQDDLQVRFSSKCLQDLGFTRYK         | 312 |
| Gerbera  | 229 | YVHDDLCECHIIYLYENPKAGRYICSSHDTIHQLAKIIKDWPEYYIPTKFGIDEELPIVVSFSNNKLDLGFQYKY-        | 307 |
|          |     | ..*****..**.*..**.*..**.*..**.*..**.*..* ..**.*..* ..**.*..* ..**.*..*              |     |
| Tobacco1 | 318 | TLEDMYKGAIECTCRQKQLLPFSTQSTADNDRDKETIPLSAENYASGKENS PVANGTGSSTNGEI                  | 381 |
| Tobacco2 | 319 | TLEDMYKGAIECTCRQKQLLPFSTRSTADNVRDKEAIPLSTENYASGKENS PVANGTGSSTNGEI                  | 382 |
| Petunia  | 317 | TLEDMYKGAIDTCRQKQLLPFSTRSAEDNGHNREAIISAQNYASGKENAPVANHTEMLSNVEV                     | 380 |
| Gentian  | 311 | TLEDMFRGAIDTCCKEKRMLPLSIGHQKESTDPEVDEVVEMELIQDSL-----                               | 359 |
| Maize    | 313 | TLEDMFDAAIRTCQEKGLIPLATAAGGDGFASVRAPGETEATIGA-----                                  | 357 |
| Gerbera  | 308 | NLEDMFKAIDTCREKGLLPYSTIKNHINGNHVGVHVIKNNGDDQEKGLLCCSKEGQ-----                       | 366 |
|          |     | ..****.*..**.*..**.*..**.*..**.*..**.*..* ..**.*..* ..**.*..* ..**.*..*             |     |

## Supplemental Figure S2
